# Supplementary material
Source: publisher figshare collection journal article supplement (https://brill.figshare.com/articles/dataset/_/8863475)
Supplement: Supplementary file 1 [file 1]

**The role of allopatric speciation and ancient origins of Bathynellidae (Crustacea) in the Pilbara (Western Australia): two new genera from the De Grey River catchment**

*Giulia Perina*

Centre for Ecosystem Management, School of Science, Edith Cowan University, 270 Joondalup Dv, Joondalup, WA 6027, Australia

Western Australian Museum, Locked Bag 49, Welshpool DC, Western Australia 6986, Australia

*g.perina@ecu.edu.au*

*Ana I. Camacho*

Museo Nacional de Ciencias Naturales (CSIC), Dpto. Biodiversidad y Biología Evolutiva C/ José Gutiérrez Abascal 2, 28006-Madrid, Spain

*Joel Huey*

Centre for Ecosystem Management, School of Science, Edith Cowan University, 270 Joondalup Dv, Joondalup, WA 6027, Australia

Western Australian Museum, Locked Bag 49, Welshpool DC, Western Australia 6986, Australia

The University of Western Australia, 35 Stirling Hwy, Crawley WA 6009, Australia

*Pierre Horwitz*

Centre for Ecosystem Management, School of Science, Edith Cowan University, 270 Joondalup Dv, Joondalup, WA 6027, Australia

*Annette Koenders*

Centre for Ecosystem Management, School of Science, Edith Cowan University, 270 Joondalup Dv, Joondalup, WA 6027, Australia.

## Supplementary material

TABLE S1 COI estimates of evolutionary divergence between sequences calculated in MEGA7

FIGURE S1 RaxML tree built from the concatenated alignment of COI, 16S, 28S, ITS2 and 18S

FIGURE S2 COI and 16S Minimum Spanning Network of the four genera constructed using PopArt software
